# Supplementary material for: A novel fluorescence method for activity assay and drug screening of T4 PNK by coupling rGO with ligase reaction
Source: Royal Society of Chemistry journal article supplement (doi:10.1039/c8an02147c), 2018-12-05
Supplement: c8an02147c1.pdf [file c8an02147c1.pdf]

## A novel fluorescence method for activity assay and drug screening of T4 PNK coupling rGO with ligase reaction

Hongyan Zhou<sup>1a†</sup>, Chunyi Tong<sup>1a†</sup>, Wei Zou<sup>3a†</sup>, Yupei Yang<sup>2</sup>, Yongbei Liu<sup>2</sup>, Bin Li<sup>2</sup>, Yan Qin<sup>2</sup>, Wenya Dang<sup>1</sup>, Bin Liu<sup>1,2\*</sup>, Wei Wang<sup>2\*</sup>

<sup>1</sup>College of Biology, Hunan University, Changsha, 410082, China

<sup>2</sup>TCM and Ethnomedicine Innovation & Development International Laboratory, Innovative Material Medical Research Institute, School of Pharmacy, Hunan University of Chinese Medicine, Changsha, 410208, China

<sup>3</sup>NHC key laboratory of birth defects research, prevention and treatment, Hunan Provincial Maternal and Child Health Care Hospital, Changsha 410008, PR China

To whom correspondence should be addressed. Tel: +86-731-89720939; Fax: +86-731-89720939;

E-mail: [binliu2001@hotmail.com](mailto:binliu2001@hotmail.com)(B. Liu); [wangwei402@hotmail.com](mailto:wangwei402@hotmail.com)(W. Wang)

**Table.S1 Sequences of Oligonucleotide probes used in this work**

| Oligo name | Base sequence (5' to 3')       | Bases | 5' modification | Tm(°C) |
|------------|--------------------------------|-------|-----------------|--------|
| P1         | CACGCCATGTCGAAATTCTTGCGTGCCTAT | 30    |                 | 76.5   |
| P2         | GCAAGAATTTTCGACATGGCGTG        | 22    |                 | 67     |
| P3         | ATAGGCAC                       | 8     | FAM             | <10    |
| P4         | GCAAGAATTTTCGACATGGCGTG        | 22    | phosphorylation | 67     |
| P5         | ATAGGCAC                       | 8     |                 | <10    |

**Table. S2 Natural compounds information**

| S.no | Source               | Name           | Structure                                                                            | Molecular Formula                              | Molecular Weight |
|------|----------------------|----------------|--------------------------------------------------------------------------------------|------------------------------------------------|------------------|
| a    | <i>Cherokee Rose</i> | Euscaphic acid | 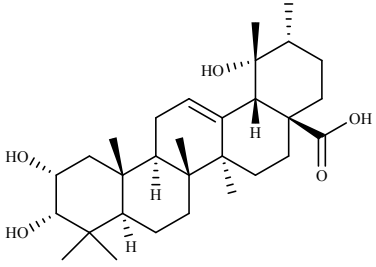 | C <sub>30</sub> H <sub>48</sub> O <sub>5</sub> | 488.70           |

|   |                         |                   |                                                                                       |                      |          |
|---|-------------------------|-------------------|---------------------------------------------------------------------------------------|----------------------|----------|
| b | <i>Cherokee Rose</i>    | Laevigatanoside A | 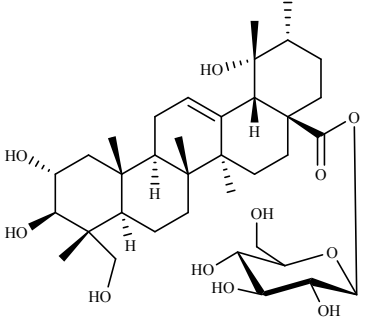    | $C_{36}H_{58}O_{11}$ | 666.84   |
| c | <i>Cherokee Rose</i>    | Syringaresinol    |     | $C_{22}H_{26}O_8$    | 418.45   |
| d | <i>kadsura coccinea</i> | Kadsuphilol A     |    | $C_{22}H_{26}O_7$    | 402.1679 |
| e | <i>kadsura coccinea</i> | Kadsutherin A     |  | $C_{26}H_{30}O_8$    | 470.1941 |

|   |                         |                      |                                                                                      |                      |          |
|---|-------------------------|----------------------|--------------------------------------------------------------------------------------|----------------------|----------|
| f | <i>kadsura coccinea</i> | Abiesatrine J        | 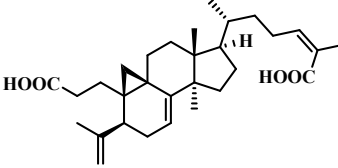   | $C_{30}H_{46}O_4$    | 470.3396 |
| g | <i>kadsura coccinea</i> | Masticadienoic acid  |    | $C_{30}H_{46}O_3$    | 454.3447 |
| h | <i>kadsura coccinea</i> | Seco-coccinic acid A |    | $C_{30}H_{48}O_3$    | 456.3603 |
| i | <i>kadsura coccinea</i> | Kadsurarin           |  | $C_{29}H_{34}O_{10}$ | 542.2152 |
| j | <i>kadsura coccinea</i> | Schisanlactone B     |  | $C_{30}H_{42}O_4$    | 466.3083 |

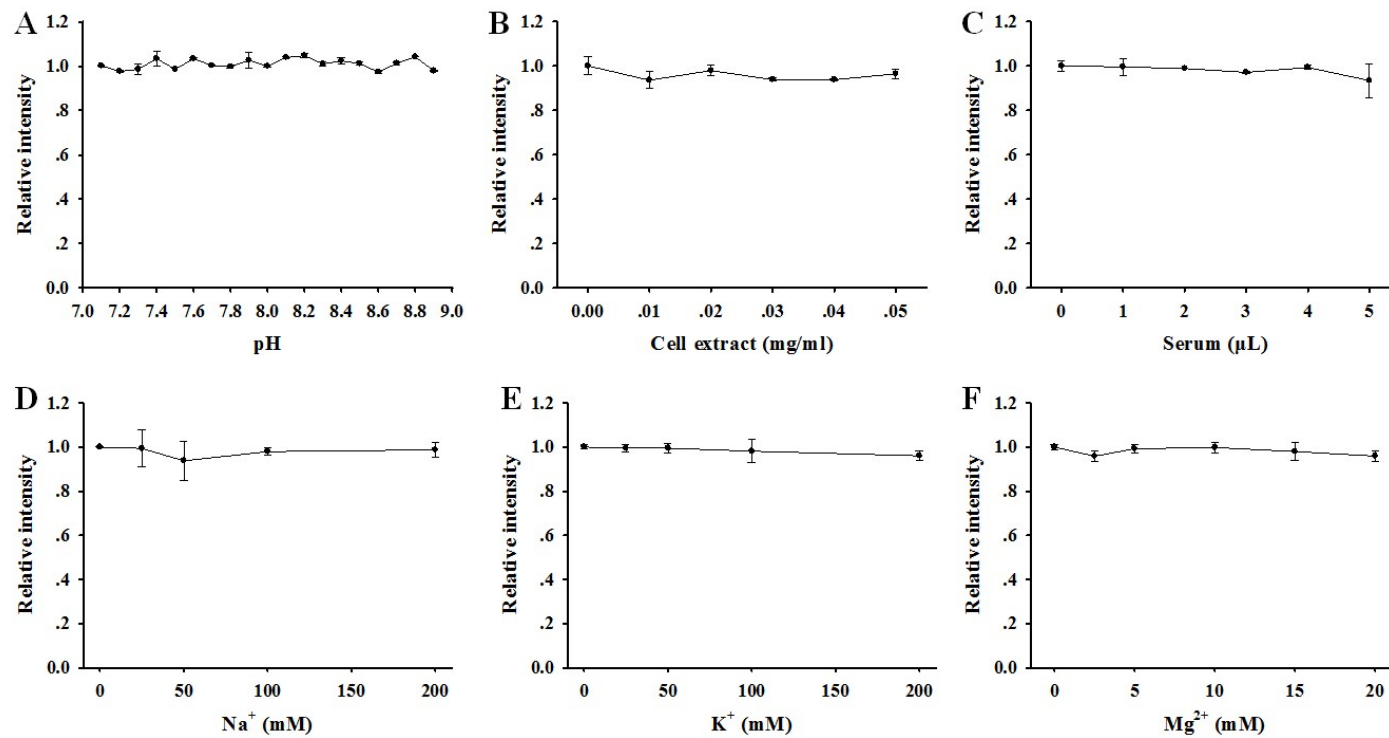

**Fig.S1** (A) The effect of pH on the stability of the probe. Reaction buffer's pH is varied from 7.1 to 8.9. The concentration of Mg<sup>2+</sup> is 10 mM. (B) The effect of cell extract on the stability of the probe. The concentration of Mg<sup>2+</sup> and pH in reaction buffer is 10mM and 8.0, respectively. (C) The effect of serum on the stability of the probe. The concentration of Mg<sup>2+</sup> and pH in reaction buffer is 10mM and 8.0, respectively. (D-F) The effect of various ions including Na<sup>+</sup>(D), K<sup>+</sup>(E), Mg<sup>2+</sup>(F) on the stability of the probe. The pH value of reaction buffer is 8.0.

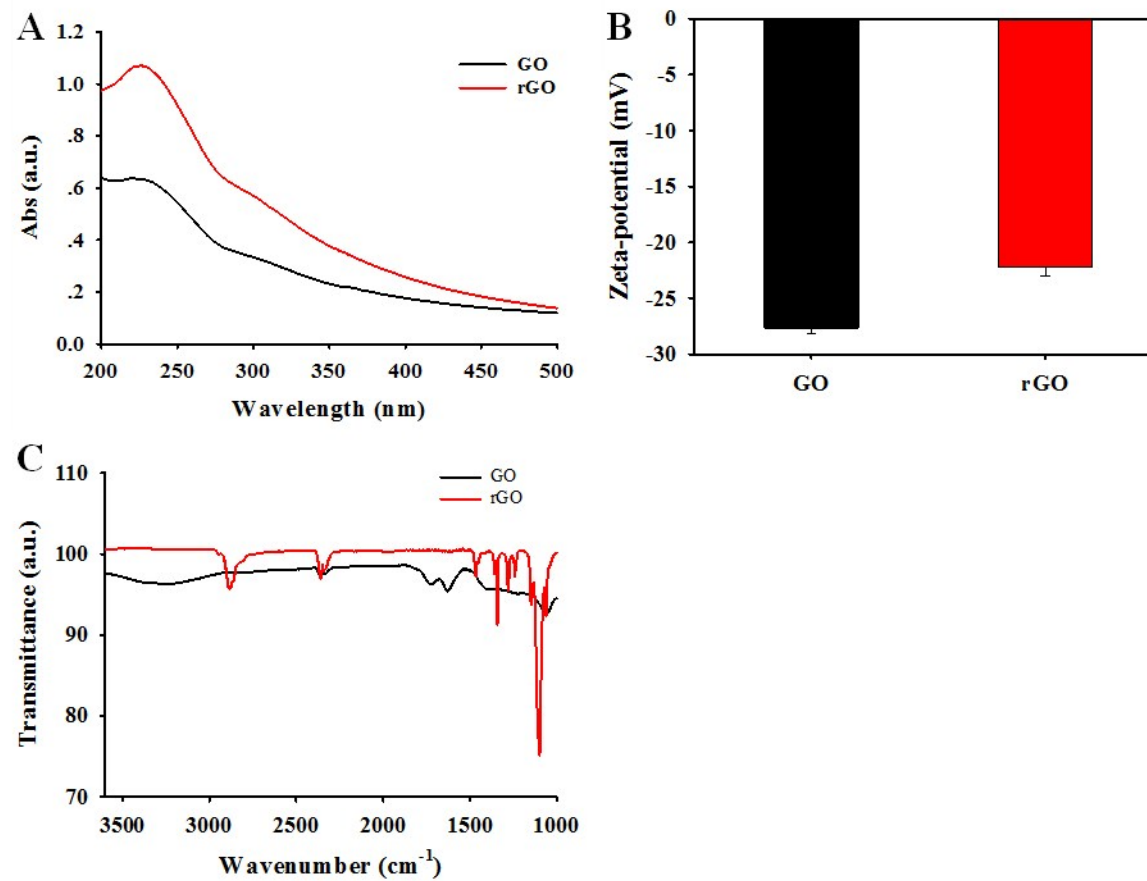

**Fig.S2** (A) The UV-vis spectrum of rGO and GO, [rGO] and [GO] are 20 mg/L, respectively. (B) The  $\zeta$ -potential of rGO and GO, [rGO] and [GO] are 10 mg/L, respectively. (C) The Infrared Spectroscopy of rGO and GO.

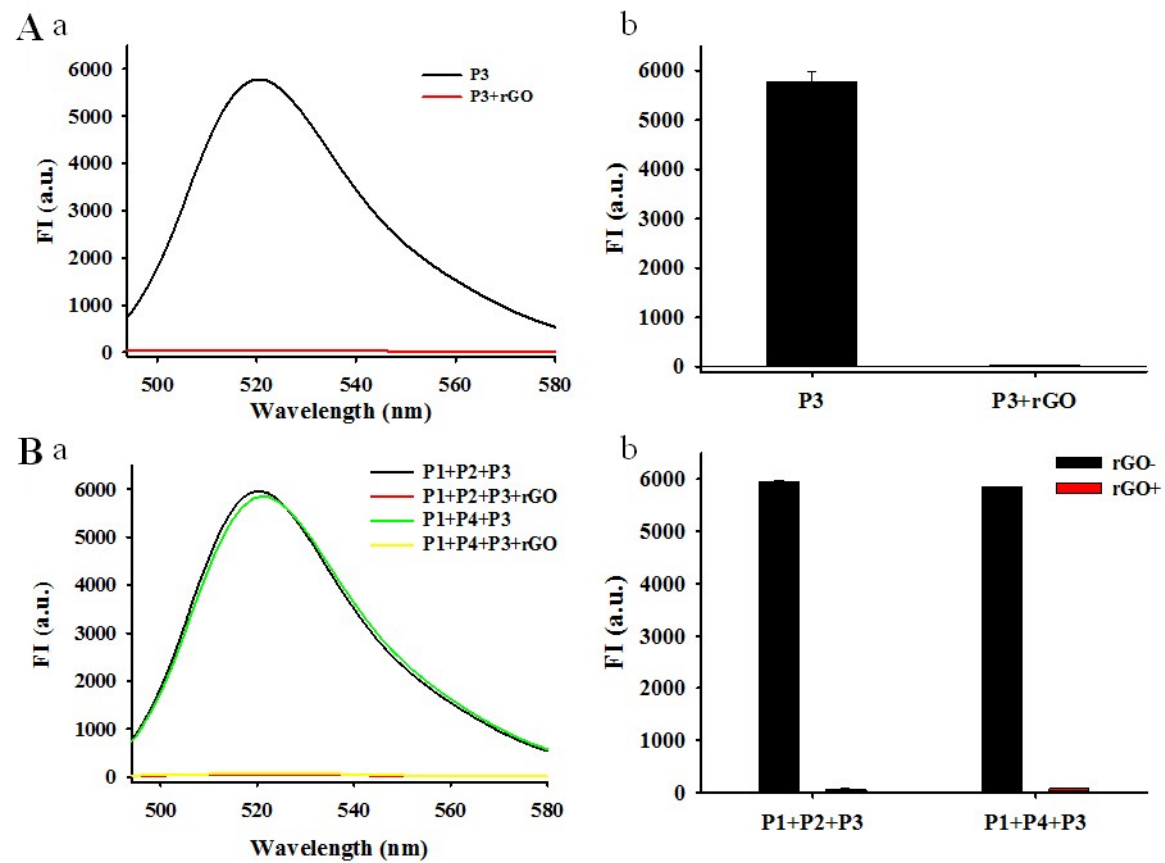

**Fig.S3** The feasibility analysis. (A) The quenching effect of rGO on P3. [P3] and [rGO] are 100 nM and 10 mg/L, respectively. (B) The quenching effect of rGO on (P1+P2+P3) and (P1+P4+P3). [P1], [P2], [P3], [P4] and [rGO] are 100 nM and 10 mg/L, respectively.
